# Supplementary material for: A minimally invasive biomarker for sensitive and accurate diagnosis of Parkinson’s disease
Source: PubMed Central journal article supplement — Acta Neuropathol Commun. 2024 Oct 22;12:167. doi: 10.1186/s40478-024-01873-1 (PMC11495072; doi:10.1186/s40478-024-01873-1), 2024-10-22
Supplement: 40478_2024_1873_MOESM1_ESM.pdf [file 40478_2024_1873_MOESM1_ESM.pdf]

# Supplementary Materials

## SUPPLEMENTARY TABLES

**Supplementary Table 1.** Clinical Characteristics of all patients with PD and HC Subjects by  $\alpha$ Syn-SAA Status in Serum or Saliva

|                                        | Parkinson's disease (PD) |                     |                  |                         |                         |                  | Healthy controls (HC) |                     |                       |                         |
|----------------------------------------|--------------------------|---------------------|------------------|-------------------------|-------------------------|------------------|-----------------------|---------------------|-----------------------|-------------------------|
|                                        | Serum                    |                     |                  | Saliva                  |                         |                  | Serum                 |                     | Saliva                |                         |
|                                        | SAA+ <sup>a</sup>        | All PD              | <i>p</i> value   | SAA+ <sup>a</sup>       | All PD                  | <i>p</i> value   | SAA+                  | All HC              | SAA+                  | All HC                  |
|                                        | n=66                     | n=82                | All PD vs HC     | n=40 (62 <sup>b</sup> ) | n=49 (83 <sup>b</sup> ) | All PD vs HC     | n=4                   | n=42                | n=1 (1 <sup>b</sup> ) | n=26 (48 <sup>b</sup> ) |
| Age (years), mean (range)              | 69.35 (44-88)            | 69.21 (44-88)       | 0.114            | 69.29 (49-85)           | 69.58 (49-87)           | <b>0.003</b>     | 69 (59-73)            | 66.55 (44-81)       | 66 (66-66)            | 64.71 (30-81)           |
| Age at diagnosis (years), mean (range) | 66.31 (39.00-88.42)      | 65.84 (39.00-88.42) | 0.733            | 65.15 (40.0-83.5)       | 65.86 (40.00-83.50)     | 0.556            | NA                    | 63.86 (51.67-74.00) | NA                    | 69.96 (65.92-74.00)     |
| Disease duration, years (range)        | 4.96 (0-17)              | 5.05 (0-17)         | NA               | 6.76 (0-31)             | 6.18 (0-31)             | NA               | NA                    | NA                  | NA                    | NA                      |
| Sex                                    | <b>0.004</b>             |                     |                  | <b>0.006</b>            |                         |                  |                       |                     |                       |                         |
| Male, number (%)                       | 35 (53.0)                | 45 (54.9)           |                  | 31 (50.0)               | 46 (55.4)               |                  | 0 (0.0)               | 11 (26.2)           | 0 (0.0)               | 14 (29.2)               |
| Female, number (%)                     | 31 (47.0)                | 37 (45.1)           |                  | 31 (50.0)               | 37 (44.6)               |                  | 4 (100.0)             | 31 (73.8)           | 1 (100.0)             | 34 (70.8)               |
| mH&Y, mean (SD)                        | 2.05 (0.44)              | 2.05 (0.48)         | NA               | 2.13 (0.59)             | 2.09 (0.61)             | NA               | NA                    | NA                  | NA                    | NA                      |
| Schwab & England, mean (SD)            | 90.23 (7.46)             | 90.55 (7.11)        | <b>&lt;0.001</b> | 92.24 (6.85)            | 91.12 (8.12)            | <b>&lt;0.001</b> | 97.5 (5.0)            | 98.97 (3.07)        | 100 (0.0)             | 99.17 (2.82)            |
| MoCA, mean (SD)                        | 26.49 (2.79)             | 26.69 (2.60)        | 0.989            | 26.69 (3.20)            | 26.74 (3.04)            | 0.426            | 27.5 (1.29)           | 26.70 (2.28)        | 20 (0.0)              | 27.24 (2.40)            |
| MDS-UPDRS                              |                          |                     |                  |                         |                         |                  |                       |                     |                       |                         |
| Part 1, mean (SD)                      | 7.69 (5.79)              | 7.34 (5.82)         | NA               | 7.35 (6.25)             | 7.58 (6.42)             | NA               | NA                    | NA                  | NA                    | NA                      |
| Part 2, mean (SD)                      | 8.98 (5.65)              | 8.69 (5.75)         | NA               | 8.26 (6.15)             | 8.16 (5.91)             | NA               | NA                    | NA                  | NA                    | NA                      |
| Part 3, mean (SD)                      | 31.78 (9.58)             | 31.46 (10.62)       | NA               | 28.96 (11.32)           | 29.00 (11.27)           | NA               | NA                    | NA                  | NA                    | NA                      |
| Parts 123, mean (SD)                   | 48.67 (16.75)            | 47.64 (17.85)       | NA               | 45.64 (17.92)           | 45.59 (18.07)           | NA               | NA                    | NA                  | NA                    | NA                      |
| Part 4 mean (SD)                       | 1.80 (2.46)              | 1.81 (2.47)         | NA               | 1.88 (2.57)             | 1.62 (2.49)             | NA               | NA                    | NA                  | NA                    | NA                      |
| Total score                            | 50.50 (17.54)            | 49.47 (18.76)       | NA               | 47.58 (18.64)           | 47.25 (19.03)           | NA               | NA                    | NA                  | NA                    | NA                      |
| PDQ39                                  |                          |                     |                  |                         |                         |                  |                       |                     |                       |                         |
| total, mean (SD)                       | 95.99 (84.03)            | 94.84 (82.14)       | <b>0.001</b>     | 79.88 (71.46)           | 87.17 (82.15)           | <b>0.003</b>     | 2.78 (4.81)           | 35.53 (65.15)       | 8.3 (0.0)             | 23.89 (31.10)           |
| mobility, mean (SD)                    | 9.42 (11.81)             | 9.05 (11.82)        | <b>0.041</b>     | 6.76 (10.33)            | 7.50 (10.98)            | 0.110            | 6.25 (12.5)           | 4.21 (10.64)        | 0.0 (0.0)             | 3.21 (7.29)             |
| ADL, mean (SD)                         | 14.79 (13.32)            | 14.47 (14.15)       | <b>&lt;0.001</b> | 11.76 (11.94)           | 12.97 (13.60)           | <b>&lt;0.001</b> | 0.0 (0.0)             | 1.79 (4.77)         | 0.0 (0.0)             | 1.39 (4.03)             |
| cognitive impairment, mean (SD)        | 13.33 (14.98)            | 12.75 (14.20)       | <b>0.006</b>     | 12.32 (14.96)           | 13.64 (16.52)           | 0.069            | 3.12 (6.25)           | 5.54 (8.13)         | 0.0 (0.0)             | 6.55 (8.50)             |
| Patient self-report                    |                          |                     |                  |                         |                         |                  |                       |                     |                       |                         |
| Dementia, number (%)                   | 10 (15.2)                | 10 (12.2)           | 0.395            | 11 (17.7)               | 12 (14.5)               | 0.065            | 1 (25.0)              | 2 (5.3)             | 0 (0.0)               | 1 (2.3)                 |
| Hyposmia, number (%)                   | 33 (50.0)                | 37 (45.1)           | <b>&lt;0.001</b> | 17 (44.7)               | 21 (42.9)               | <b>0.001</b>     | 0 (0.0)               | 1 (2.6)             | 0 (0.0)               | 0 (0.0)                 |
| Constipation, number (%)               | 31 (47.7)                | 38 (46.9)           | <b>&lt;0.001</b> | 17 (44.7)               | 24 (49.0)               | <b>0.001</b>     | 0 (0.0)               | 2 (5.3)             | 0 (0.0)               | 1 (4.5)                 |
| ESS, mean (SD)                         | 5.97 (3.71)              | 5.95 (3.68)         | 0.119            | 6.24 (3.72)             | 6.66 (3.80)             | 0.075            | 3.50 (2.38)           | 4.87 (2.98)         | 2.00 (0.0)            | 5.04 (3.13)             |
| HAM-A, Mean (SD)                       | 7.89 (7.23)              | 7.70 (7.06)         | 0.162            | 7.63 (7.55)             | 8.00 (7.69)             | 0.387            | 8.25 (13.87)          | 5.85 (5.97)         | 3.00 (0.0)            | 6.40 (6.73)             |
| HAM-D, mean (SD)                       | 5.97 (5.64)              | 5.75 (5.44)         | <b>0.025</b>     | 5.64 (5.86)             | 6.00 (5.83)             | 0.078            | 4.25 (7.23)           | 3.51 (3.98)         | 2 (0.0)               | 3.60 (4.31)             |
| RBD, number (%)                        | 29 (48.3)                | 35 (46.1)           | <b>&lt;0.001</b> | 17 (50.0)               | 23 (52.3)               | <b>&lt;0.001</b> | 0 (0.0)               | 0 (0.0)             | 0 (0.0)               | 0 (0.0)                 |

<sup>a</sup>Patients with positive  $\alpha$ Syn-SAA in the indicated samples. <sup>b</sup>Total number of saliva donors that include a subset of subjects with information on age, age at diagnosis, disease duration, sex, mH&Y, MoCA, and MSD-UPDRS 3 only.

**Supplementary Table 2.** Clinical Correlation Analysis by  $\alpha$ Syn<sup>D</sup> Seeding Activities in Serum or Saliva of Patients with PD

|                                  | Serum (n = 82)     |             | Saliva (n = 83)    |             |
|----------------------------------|--------------------|-------------|--------------------|-------------|
| <b>Pearson's correlation</b>     | <i>r</i>           | <i>p</i>    | <i>r</i>           | <i>p</i>    |
| Age                              | -0.12              | 0.28        | -0.10              | 0.38        |
| Disease duration                 | 0.05               | 0.63        | 0.03               | 0.78        |
| Age at diagnosis                 | -0.15              | 0.20        | <b>-0.34</b>       | <b>0.02</b> |
| Schwab & England                 | -0.14              | 0.21        | 0.025              | 0.87        |
| mH&Y                             | -0.05              | 0.69        | -0.04              | 0.70        |
| MoCA                             | <b>-0.24</b>       | <b>0.04</b> | 0.13               | 0.35        |
| MDS-UPDRS                        |                    |             |                    |             |
| Part 1                           | 0.05               | 0.65        | -0.07              | 0.64        |
| Part 2                           | 0.01               | 0.93        | -0.07              | 0.66        |
| Part 3                           | 0.02               | 0.85        | -0.05              | 0.67        |
| Part 123                         | 0.03               | 0.81        | -0.12              | 0.43        |
| Part 4                           | 0.04               | 0.73        | -0.05              | 0.76        |
| Total                            | 0.03               | 0.79        | -0.12              | 0.43        |
| PDQ39                            |                    |             |                    |             |
| Total                            | 0.08               | 0.52        | -0.07              | 0.68        |
| Mobility                         | 0.01               | 0.93        | -0.15              | 0.34        |
| ADL                              | <0.01              | 0.97        | -0.17              | 0.28        |
| Cognitive impairment             | <b>0.21</b>        | <b>0.07</b> | -0.07              | 0.66        |
| ESS                              | -0.15              | 0.19        | -0.23              | 0.13        |
| HAM-A                            | 0.13               | 0.25        | 0.05               | 0.76        |
| HAM-D                            | <b>0.24</b>        | <b>0.03</b> | 0.05               | 0.75        |
|                                  |                    |             |                    |             |
| <b>ANOVA</b>                     | <b>Higher mean</b> | <i>p</i>    | <b>Higher mean</b> | <i>p</i>    |
| Sex                              | female             | 0.95        | Female             | 0.31        |
| RBD                              | no                 | 0.21        | <b>no</b>          | <b>0.04</b> |
| Orthostatic hypotension (vitals) | yes                | 0.72        | no                 | 0.84        |
| Patient self-report              |                    |             |                    |             |
| Hyposmia                         | yes                | 0.11        | no                 | 0.63        |
| Orthostatic hypotension          | yes                | 0.97        | yes                | 0.66        |
| Constipation                     | yes                | 0.98        | Yes                | 0.50        |
| Dementia                         | yes                | 0.16        | Yes                | 0.27        |

**Supplementary Table 3.** Correlation Subgroup Analysis by Sex or Age by Serum  $\alpha$ Syn<sup>D</sup> Seeding Activities of Patients with PD

|                                  | Sex                |             |                    |             | Age                 |             |                     |             |
|----------------------------------|--------------------|-------------|--------------------|-------------|---------------------|-------------|---------------------|-------------|
|                                  | Female (n = 37)    |             | Male (n = 46)      |             | < 70 years (n = 39) |             | ≥ 70 years (n = 44) |             |
| <b>Pearson's correlation</b>     | <i>r</i>           | <i>p</i>    | <i>r</i>           | <i>p</i>    | <i>r</i>            | <i>p</i>    | <i>r</i>            | <i>p</i>    |
| Age                              | -0.17              | 0.33        | -0.09              | 0.57        | 0.03                | 0.84        | -0.16               | 0.30        |
| Disease duration                 | -0.03              | 0.88        | 0.12               | 0.45        | 0.01                | 0.95        | 0.11                | 0.49        |
| Age at diagnosis                 | -0.18              | 0.30        | -0.12              | 0.44        | 0.01                | 0.96        | -0.14               | 0.39        |
| Schwab & England                 | -0.18              | 0.28        | -0.10              | 0.51        | -0.21               | 0.21        | -0.12               | 0.43        |
| mH&Y                             | -0.02              | 0.93        | -0.07              | 0.66        | 0.05                | 0.75        | -0.08               | 0.63        |
| MoCA                             | -0.07              | 0.70        | <b>-0.38</b>       | <b>0.01</b> | -0.25               | 0.15        | <b>-0.29</b>        | <b>0.07</b> |
| MDS-UPDRS                        |                    |             |                    |             |                     |             |                     |             |
| Part 1                           | 0.04               | 0.82        | 0.07               | 0.68        | 0.27                | 0.12        | -0.21               | 0.19        |
| Part 2                           | 0.09               | 0.62        | -0.02              | 0.89        | 0.14                | 0.44        | -0.04               | 0.78        |
| Part 3                           | 0.25               | 0.16        | -0.15              | 0.35        | 0.24                | 0.16        | -0.15               | 0.35        |
| Part 123                         | 0.19               | 0.30        | -0.07              | 0.67        | 0.29                | 0.09        | -0.12               | 0.45        |
| Part 4                           | 0.09               | 0.62        | <-0.01             | 0.98        | 0.08                | 0.63        | 0.03                | 0.85        |
| Total                            | 0.19               | 0.30        | -0.07              | 0.68        | 0.29                | 0.09        | -0.14               | 0.39        |
| PDQ39                            |                    |             |                    |             |                     |             |                     |             |
| Total                            | 0.10               | 0.62        | 0.09               | 0.62        | 0.32                | 0.09        | -0.14               | 0.43        |
| Mobility                         | 0.09               | 0.63        | -0.08              | 0.64        | 0.22                | 0.21        | -0.03               | 0.84        |
| ADL                              | 0.07               | 0.69        | -0.03              | 0.86        | 0.17                | 0.34        | -0.10               | 0.55        |
| Cognitive impairment             | <b>0.32</b>        | <b>0.07</b> | 0.17               | 0.27        | 0.23                | 0.18        | 0.16                | 0.33        |
| ESS                              | -0.20              | 0.26        | -0.11              | 0.50        | 0.02                | 0.92        | <b>-0.33</b>        | <b>0.03</b> |
| HAM-A                            | 0.21               | 0.23        | 0.06               | 0.69        | <b>0.36</b>         | <b>0.04</b> | -0.13               | 0.40        |
| HAM-D                            | <b>0.36</b>        | <b>0.04</b> | 0.14               | 0.36        | <b>0.43</b>         | <b>0.01</b> | 0.02                | 0.92        |
| <b>ANOVA</b>                     | <b>Higher mean</b> | <i>p</i>    | <b>Higher mean</b> | <i>p</i>    | <b>Higher mean</b>  | <i>p</i>    | <b>Higher mean</b>  | <i>p</i>    |
| Sex                              | -                  | -           | -                  | -           | male                | 0.56        | female              | 0.61        |
| RBD                              | No                 | 0.17        | yes                | 0.68        | yes                 | 0.56        | <b>no</b>           | <b>0.03</b> |
| Orthostatic hypotension (vitals) | yes                | 0.40        | no                 | 0.78        | <b>yes</b>          | <b>0.01</b> | no                  | 0.31        |
| Patient self-report              |                    |             |                    |             |                     |             |                     |             |
| Hyposmia                         | yes                | 0.67        | yes                | 0.09        | yes                 | 0.09        | yes                 | 0.41        |
| Orthostatic hypotension          | no                 | 0.48        | yes                | 0.71        | yes                 | 0.76        | yes                 | 0.83        |
| Constipation                     | no                 | 0.76        | yes                | 0.78        | yes                 | 0.35        | no                  | 0.63        |
| Dementia                         | yes                | 0.24        | yes                | 0.33        | yes                 | 0.26        | yes                 | 0.28        |

**Supplementary Table 4.** Correlation Subgroup Analysis by Sex or Age by Saliva  $\alpha$ Syn<sup>D</sup> Seeding Activities of Patients with PD

|                                  | Sex                |          |                    |             | Age                 |             |                     |             |
|----------------------------------|--------------------|----------|--------------------|-------------|---------------------|-------------|---------------------|-------------|
|                                  | Female (n = 37)    |          | Male (n = 46)      |             | < 70 years (n = 39) |             | ≥ 70 years (n = 44) |             |
| <b>Pearson's correlation</b>     | <i>r</i>           | <i>p</i> | <i>r</i>           | <i>p</i>    | <i>r</i>            | <i>p</i>    | <i>r</i>            | <i>p</i>    |
| Age                              | <0.01              | 0.99     | -0.19              | 0.21        | -0.13               | 0.44        | -0.17               | 0.28        |
| Disease duration                 | 0.07               | 0.67     | -0.01              | 0.93        | -0.11               | 0.50        | 0.12                | 0.43        |
| Age at diagnosis                 | -0.33              | 0.13     | <b>-0.42</b>       | <b>0.04</b> | <b>-0.52</b>        | <b>0.01</b> | 0.08                | 0.72        |
| Schwab & England                 | -0.08              | 0.70     | 0.13               | 0.53        | 0.33                | 0.11        | <b>-0.47</b>        | <b>0.02</b> |
| mH&Y                             | 0.25               | 0.15     | -0.17              | 0.27        | -0.10               | 0.56        | <-0.01              | 0.97        |
| MoCA                             | 0.07               | 0.77     | 0.15               | 0.46        | 0.18                | 0.37        | 0.08                | 0.72        |
| MDS-UPDRS                        |                    |          |                    |             |                     |             |                     |             |
| Part 1                           | 0.17               | 0.45     | -0.22              | 0.31        | -0.17               | 0.45        | 0.11                | 0.64        |
| Part 2                           | 0.08               | 0.73     | -0.13              | 0.56        | -0.16               | 0.46        | 0.03                | 0.89        |
| Part 3                           | 0.12               | 0.50     | -0.13              | 0.39        | -0.02               | 0.89        | -0.05               | 0.75        |
| Part 123                         | 0.16               | 0.49     | -0.32              | 0.13        | -0.18               | 0.42        | -0.02               | 0.95        |
| Part 4                           | 0.06               | 0.79     | -0.16              | 0.47        | -0.08               | 0.73        | <0.01               | 0.99        |
| Total                            | 0.16               | 0.50     | -0.33              | 0.12        | -0.18               | 0.40        | -0.01               | 0.96        |
| PDQ39                            |                    |          |                    |             |                     |             |                     |             |
| Total                            | 0.33               | 0.18     | -0.28              | 0.21        | -0.22               | 0.32        | 0.18                | 0.47        |
| Mobility                         | -0.12              | 0.60     | -0.18              | 0.42        | -0.23               | 0.30        | -0.08               | 0.73        |
| ADL                              | -0.10              | 0.68     | -0.20              | 0.35        | -0.19               | 0.40        | -0.18               | 0.50        |
| Cognitive impairment             | 0.35               | 0.12     | -0.22              | 0.32        | -0.12               | 0.58        | -0.04               | 0.85        |
| ESS                              | -0.06              | 0.78     | -0.36              | 0.09        | -0.34               | 0.11        | -0.11               | 0.64        |
| HAM-A                            | 0.33               | 0.13     | -0.19              | 0.38        | -0.01               | 0.95        | 0.08                | 0.72        |
| HAM-D                            | 0.35               | 0.13     | -0.18              | 0.43        | 0.02                | 0.93        | <0.01               | 0.97        |
| <b>ANOVA</b>                     | <b>Higher mean</b> | <i>p</i> | <b>Higher mean</b> | <i>p</i>    | <b>Higher mean</b>  | <i>p</i>    | <b>Higher mean</b>  | <i>p</i>    |
| Sex                              | -                  | -        | -                  | -           | female              | 0.81        | female              | 0.14        |
| RBD                              | no                 | 0.13     | no                 | 0.34        | no                  | 0.13        | no                  | 0.15        |
| Orthostatic hypotension (vitals) | no                 | 0.37     | yes                | 0.25        | yes                 | 0.28        | no                  | 0.62        |
| Patient self-report              |                    |          |                    |             |                     |             |                     |             |
| Hyposmia                         | no                 | 0.61     | no                 | 0.92        | no                  | 0.09        | yes                 | 0.36        |
| Orthostatic hypotension          | no                 | 0.84     | no                 | 0.70        | no                  | 0.37        | yes                 | 0.79        |
| Constipation                     | yes                | 0.68     | yes                | 0.81        | yes                 | 0.67        | no                  | 0.69        |
| Dementia                         | yes                | 0.98     | yes                | 0.15        | yes                 | 0.37        | yes                 | 0.51        |

## SUPPLEMENTARY FIGURES

**Supplementary Figure 1.** Assessment of  $\alpha$ Syn-SAA reproducibility and recombinant  $\alpha$ Syn batch variations

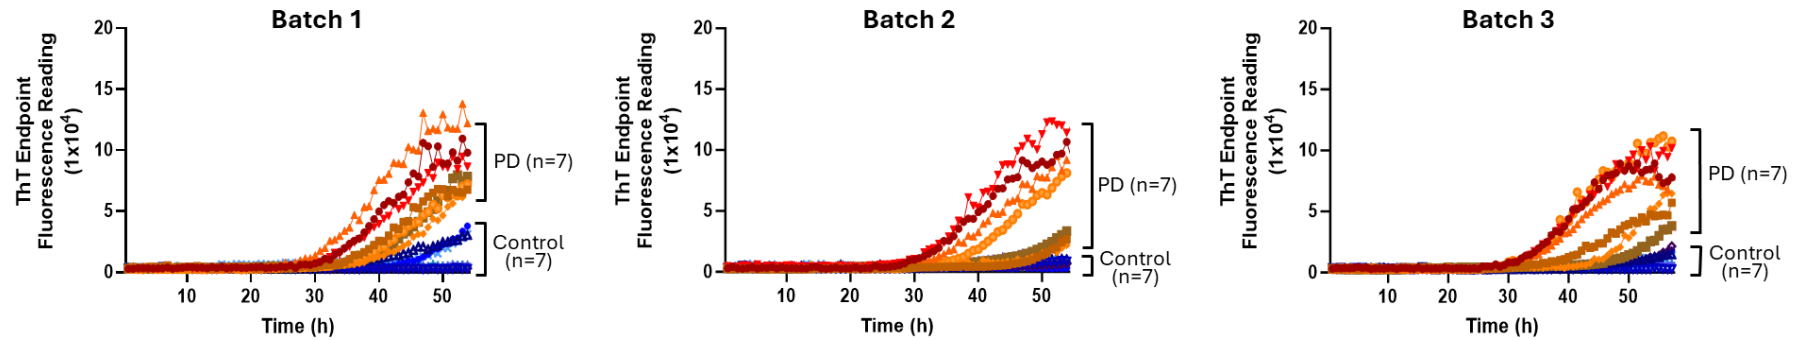

Three batches of recombinant  $\alpha$ Syn protein were used for  $\alpha$ Syn-SAA assays with RT-QuIC on seven biopsy skin samples each from known PD and healthy control subjects (Control). The  $\alpha$ Syn-SAA assays of these skin samples were conducted as reported [21]. The ThT fluorescence curves obtained with each of the three batches are presented in the respective panel. Each curve reflects the average of the kinetic curves of quadruplicate wells of a sample. Each PD case is indicated by a distinct color.

**Supplementary Figure 2.** Comparison of  $\alpha$ Syn<sup>D</sup> Seeding Activity in All Serum or Saliva Samples from Patients with Probable or Possible PD and Healthy Control (HC) by  $\alpha$ Syn-SAA

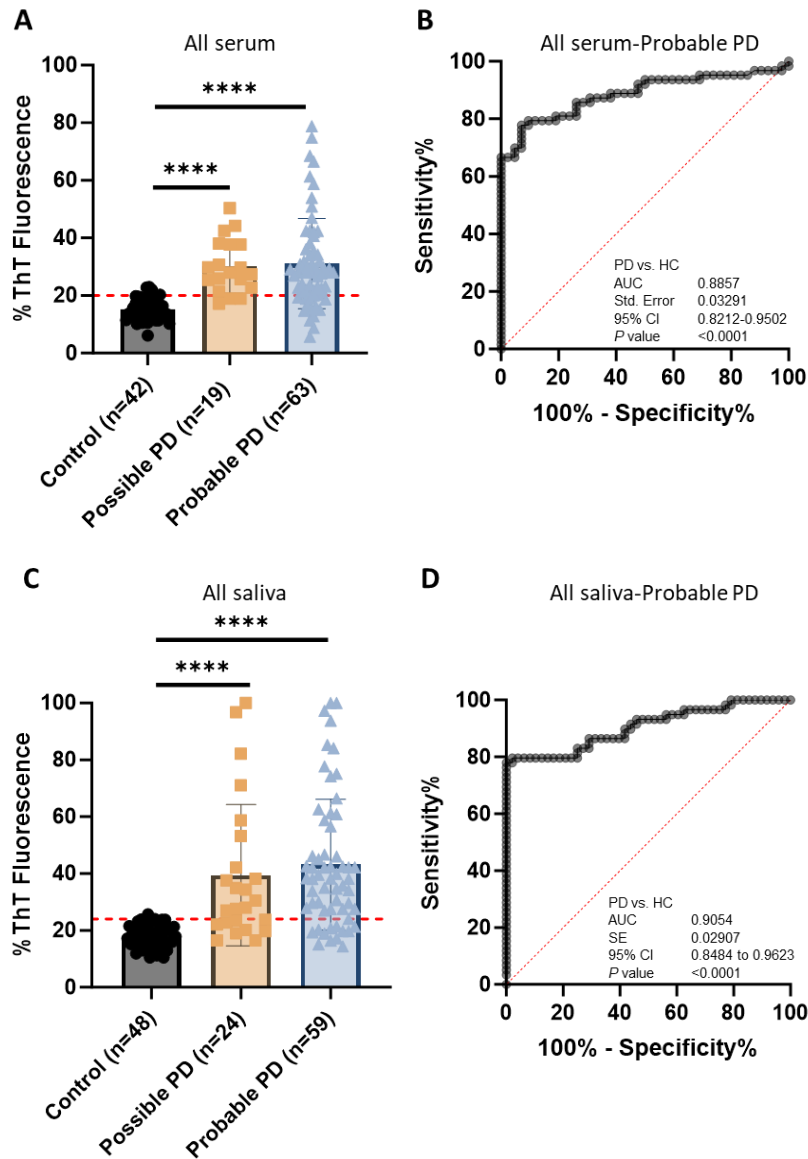

**A.** Scatter graph of RT-QuIC endpoint ThT fluorescence intensity ( $\alpha$ Syn<sup>D</sup> seeding activity) of serum samples from all patients with PD and HC subjects. Scatter graph of the average of the endpoint ThT fluorescence in quadruplicate wells as a percentage of the maximum fluorescence (%ThT fluorescence) of serum samples from 19 patients with possible PD, 63 patients with probable PD, and 42 HC subjects. ThT fluorescence cutoff: 52,105. \*\*\*\*  $p < 0.0001$ . **B.** ROC curve and AUC for  $\alpha$ Syn<sup>D</sup> seeding activity comparisons between serum samples of the patients with probable PD and HC subjects. ROC curve and AUC value for  $\alpha$ Syn<sup>D</sup> seeding activities in the serum of all patients with probable PD and HC subjects are shown. SE, standard error. 95% CI, 95% confidence interval. **C.** Scatter graph of RT-QuIC endpoint ThT fluorescence intensity ( $\alpha$ Syn<sup>D</sup> seeding activities) of saliva samples from all patients with PD and HC subjects. Scatter graph of the average of the endpoint ThT fluorescence in quadruplicate wells as a percentage of the maximum possible fluorescence (%ThT fluorescence) of saliva samples from 24 patients with possible PD, 59 patients with probable PD, and 48 HC subjects. ThT fluorescence cutoff: 62,613. \*\*\*\*  $p < 0.0001$ . **D.** ROC curve and AUC for  $\alpha$ Syn<sup>D</sup> seeding activity comparisons between saliva samples of the 59 probable PD patients and 48 HC subjects. ROC curve and AUC value for  $\alpha$ Syn<sup>D</sup> seeding activities in the serum of all probable PD patients and HC subjects are shown. SE, standard error. 95% CI, 95% confidence interval.

**Supplementary Figure 3.** Comparison of  $\alpha$ Syn<sup>D</sup> Seeding Activity in Serum or Saliva Samples from Patients with Probable or Possible PD and Healthy Control (HC) of the ss-subset by RT-QuIC

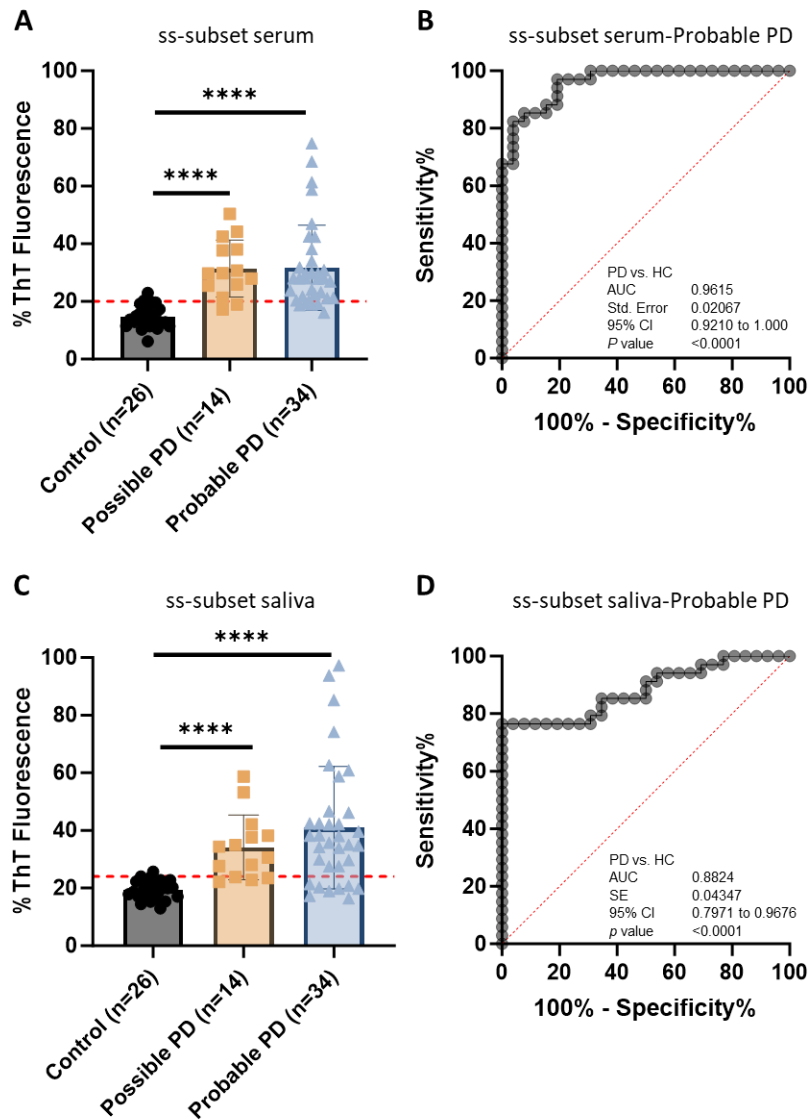

**A.** Scatter graph of RT-QuIC endpoint ThT fluorescence intensity ( $\alpha$ Syn<sup>D</sup> seeding activity) of serum samples from patients with PD and HC subjects of the ss-subset. Scatter graph of the average of the endpoint ThT fluorescence in quadruplicate wells as a percentage of the maximum possible fluorescence (%ThT fluorescence) of serum samples from 14 patients with possible PD, 34 patients with probable PD, and 26 HC subjects. ThT fluorescence cutoff: 52,105. \*\*\*\*  $p < 0.0001$ . **B.** ROC curve and AUC for  $\alpha$ Syn<sup>D</sup> seeding activity comparisons between serum samples of patients with probable PD and HC subjects of the ss-subset. ROC curve and AUC value for  $\alpha$ Syn<sup>D</sup> seeding activities in the serum of patients with probable PD and HC subjects of the ss-subset are shown. SE, standard error. 95% CI, 95% confidence interval. **C.** Scatter graph of RT-QuIC endpoint ThT fluorescence intensity ( $\alpha$ Syn<sup>D</sup> seeding activity) of saliva samples from patients with PD and HC subjects of the ss-subset. Scatter graph of the average of the endpoint ThT fluorescence in quadruplicate wells as a percentage of the maximum fluorescence (%ThT fluorescence) of saliva samples from 14 patients with possible PD, 34 patients with probable PD, and 26 HC subjects. ThT fluorescence cutoff: 62,613. \*\*\*\*  $p < 0.0001$ . **D.** ROC curve and AUC for  $\alpha$ Syn<sup>D</sup> seeding activity comparisons between saliva samples of the 34 patients with probable PD and 26 HC subjects. ROC curve and AUC value for  $\alpha$ Syn<sup>D</sup> seeding activities in the serum of patients with probable PD and HC subjects in the ss-subset are shown. SE, standard error. 95% CI, 95% confidence interval.

**Supplementary Figure 4.** Cumulative RT-QuIC ThT fluorescence curves for serum and saliva samples of the ss-subset

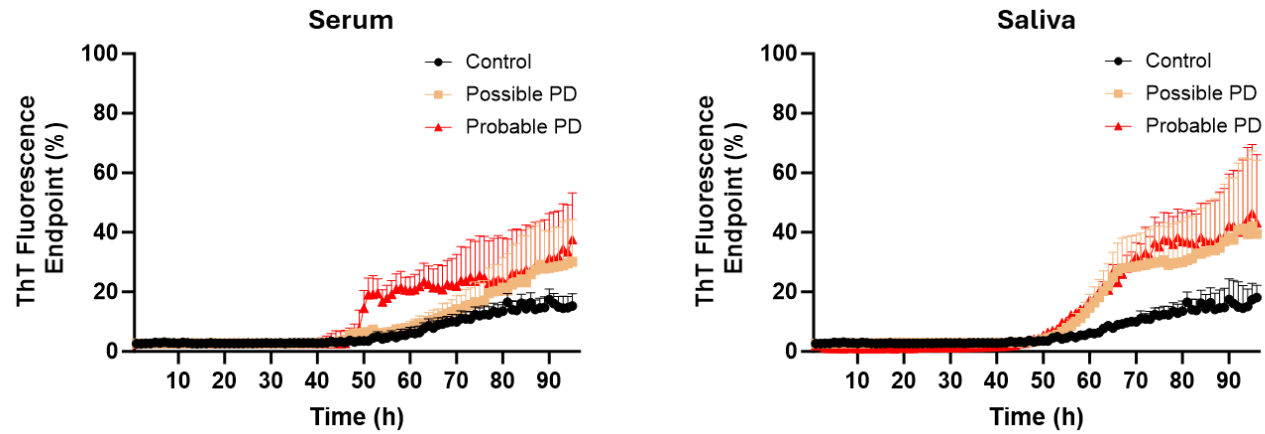

The cumulative RT-QuIC ThT fluorescence curves for the serum or saliva samples of the 48 patients with PD (34 probable and 14 possible) and 26 HC subjects of the ss-subset shown in Figure 3 are presented. The curves represent the mean and standard deviation of all the serum/saliva samples of the ss-subset over time
